# Supplementary material for: Seroprevalence of Anti-SARS-CoV-2 Antibodies among Municipal Staff in the Municipality of Prishtina
Source: MDPI journal article supplement (doi:10.3390/ijerph182312545), 2021-11-28
Supplement: s1 [file s1]

# Supplementary Material

## Questionnaire for the study about COVID-19

**THIS PART OF INFORMATION IS COLLECTED FROM THE RESPONDENT BY PHONE**

### **I. Sample entry and selection**

*\* START SELECTING THE RESPONDENT BY VERIFYING HIS / HER IDENTITY FROM THE SAMPLE LIST \**

*1. INTRODUCTION. "HELLO! I AM \_\_\_\_\_ AND I AM CALLING YOU ON BEHALF OF THE MUNICIPALITY OF PRISHTINA. ARE YOU [NAME AND SURNAME FROM THE LIST]? WE HAVE RECEIVED YOUR PHONE NUMBER FROM INFORMATION YOU GAVE WHEN YOU WERE TESTED FOR COVID-19 IN THE MUNICIPALITY OF PRISHTINA. THE MUNICIPALITY OF PRISHTINA IS CARRYING OUT A STUDY ABOUT THE SPREAD OF THE COVID-19 VIRUS AMONG THE WORKERS OF THE MUNICIPALITY OF PRISHTINA. ONE OF THE GOALS OF THE STUDY IS THE ANALYSIS OF THE RESULTS OF SEROLOGICAL TESTS. "*

*P1. CAN I GET YOUR CONSENT TO USE THE RESULT OF YOUR SEROLOGICAL TEST FOR STATISTICAL ANALYSIS? IN ACCORDANCE WITH INTERNATIONAL RESEARCH STANDARDS, YOUR TEST RESULT WILL NEVER BE RELATED TO YOUR PERSONAL IDENTITY DATA. YOUR PERSONAL IDENTITY DATA WILL BE DISPOSED AFTER RESEARCH QUALITY CONTROL AND WILL NOT BE USED DURING STATISTICAL ANALYSIS.*

- |               |                                                                |
|---------------|----------------------------------------------------------------|
| <i>1. YES</i> | <i>CONTINUE</i>                                                |
| <i>2. NO</i>  | <i>END THE INTERVIEW AND CONTINUE WITH THE NEXT RESPONDENT</i> |

*"AS PART OF THIS STUDY I WOULD LIKE TO ASK YOU SOME QUESTIONS ABOUT YOUR HEALTH CONDITION AND YOUR EXPOSURE TO THE COVID-19 VIRUS. IF YOU HAVE A FEW MINUTES, PLEASE ANSWER THE FOLLOWING QUESTIONS. YOUR ANSWERS WILL BE COMPLETELY SECRET, IN ACCORDANCE WITH INTERNATIONAL RESEARCH STANDARDS. "*

*2. IF THE RESPONDENT REJECTS TO PARTICIPATE, CONTINUE TO THE NEXT RESPONDENT.*

*3. IF THE RESPONDENT CANNOT RESPOND AT THE MOMENT, TRY TO ASSIGN THE CALL FOR LATER IN THE DAY OR DURING THE NEXT WORKING DAYS. ENTER THE MOST SUITABLE DATE AND TIME FOR THE RESPONDENT.*

## II. Basic information about the respondent

M1. Respondent identification number from the sample list \_\_ \_\_ \_\_

M2. In which municipality do you currently live?

1. Prishtina

2. Other municipality. WRITE: \_\_\_\_\_

M3. Is your place of residence urban or rural?

1. Urban

2. Rural

M4. IF YOU LIVE IN URBAN PRISTINA: In which neighborhood of Prishtina do you live?

1. Qendër

10. Taukbashqe

18. Tjetër

2. Bregu i Diellit

11. Arbëri (Dragodan)

\_\_\_\_\_

3. Ulpianë

12. Vetërnik

4. Dardani

13. Kodra e Trimave

5. Lakrishte

14. Kolovicë

6. Lagja e Muhaxherëve

15. Kalabria

7. Velani

16. Tophane

8. Mati I

17. Sofali

9. Lagja e Spitalit

### III. Information about the respondent and his / her position

|                                                                               |                                                                                                                                                                                                                                                                                                                                                                                   |
|-------------------------------------------------------------------------------|-----------------------------------------------------------------------------------------------------------------------------------------------------------------------------------------------------------------------------------------------------------------------------------------------------------------------------------------------------------------------------------|
| Q1. What is the highest level of education you have completed?                | 1. Primary<br>2. Secondary<br>3. University<br>4. Masters/PhD                                                                                                                                                                                                                                                                                                                     |
| Q2. Gender?                                                                   | 1. Female<br>2. Male                                                                                                                                                                                                                                                                                                                                                              |
| Q3. Year of birth ____                                                        |                                                                                                                                                                                                                                                                                                                                                                                   |
| Q4. Do you know your blood type? If yes: What is your blood group?            | 1. A<br>2. B<br>3. AB<br>4. O<br>5. Don't know – GO TO Q6                                                                                                                                                                                                                                                                                                                         |
| Q5. Do you know the RH factor of your blood type? If yes: What is the factor? | 1. Rh+<br>2. Rh-<br>3. Don't know                                                                                                                                                                                                                                                                                                                                                 |
| Q6. Which field do you work in?                                               | 1. Administration<br>2. Health<br>3. Social Welfare<br>4. Education<br>5. Culture<br>6. Sport<br>7. Agriculture<br>8. Finance<br>9. Property<br>10. Urbanism<br>11. Capital Investment and Contract Management<br>12. Public Services, Protection and Rescue<br>13. Cadaster<br>14. Inspection<br>15. Strategic Planning and Sustainable Development<br>16. Parks<br>17. MFMC/EMC |
| Q7. Are you a health worker?                                                  | 1. Yes GO TO Q8<br>2. No SKIP TO Q9                                                                                                                                                                                                                                                                                                                                               |
| Q8. What kind of health worker are you?                                       | 1. Doctor<br>2. Nurse<br>3. Technician<br>4. Administrative staff<br>5. Other, specify _____                                                                                                                                                                                                                                                                                      |

#### IV. Information about the respondent's family and household economy

|                                                                                                            |                                                                                                      |
|------------------------------------------------------------------------------------------------------------|------------------------------------------------------------------------------------------------------|
| Q9. Household size:                                                                                        | __ __  members                                                                                       |
| Q10. The size of the living space:                                                                         | __ __ __  square meters                                                                              |
| Q11. Do you have a member of your household who is or has been infected with COVID-19, excluding yourself? | <div>1. Yes                      GO TO Q12</div> <div>2. No                        SKIP TO Q13</div> |
| Q12. How many members of your household are or have been infected with COVID-19 excluding yourself?        | __ __ members                                                                                        |

| Q13. Please evaluate whether each of these statements about you and your family members is true, somewhat true, somewhat untrue or not true: |      |               |                 |          |         |
|----------------------------------------------------------------------------------------------------------------------------------------------|------|---------------|-----------------|----------|---------|
|                                                                                                                                              | True | Somewhat true | Somewhat untrue | Not true | DK/Ref. |
| a. You and all family members wear masks properly (mouth and nose)                                                                           | 1    | 2             | 3               | 4        | 9       |
| b. You and your family do not go to family gatherings and parties                                                                            | 1    | 2             | 3               | 4        | 9       |
| c. You and your family do not visit the malls                                                                                                | 1    | 2             | 3               | 4        | 9       |
| d. You and your family do not visit gastronomy bars                                                                                          | 1    | 2             | 3               | 4        | 9       |
| e. You think your whole family has been careful and protected in every way from COVID-19                                                     | 1    | 2             | 3               | 4        | 9       |

## V. Information about health status

| The following questions require answers regarding your health status.      |                                                                                                                                                                                                                                                                                                                                                                                                                                                                                                                                                                                                              |
|----------------------------------------------------------------------------|--------------------------------------------------------------------------------------------------------------------------------------------------------------------------------------------------------------------------------------------------------------------------------------------------------------------------------------------------------------------------------------------------------------------------------------------------------------------------------------------------------------------------------------------------------------------------------------------------------------|
| Q14. Do you currently suffer from any of these diseases? (read and circle) | 1. Cancer<br>2. Chronic kidney disease<br>3. Chronic Obstructive Pulmonary Disease (COPD)<br>4. Weakened immune system from transplantation of solid organs<br>5. Obesity (overweight)<br>6. Serious heart conditions<br>7. Falciform cell disease (sickle cell)<br>8. Type 2 diabetes<br>9. None of the above                                                                                                                                                                                                                                                                                               |
| Q15. Do you currently suffer from other diseases? (read and circle)        | 1. Asthma (moderate to severe)<br>2. Cerebrovascular disease (affects the blood vessels and blood supply to the brain)<br>3. Cystic fibrosis<br>4. Hypertension or elevated blood pressure<br>5. Immune system weakened by blood or bone marrow transplantation, immune deficiencies, HIV, use of corticosteroids or use of other drugs that weaken the immune response<br>6. Neurological disorders, such as dementia<br>7. Liver disease<br>9. Pulmonary fibrosis (presence of lung tissue damage or injury)<br>11. Thalassemia (a type of blood disorder)<br>12. Type 1 diabetes<br>13. None of the above |
| Q16. FOR WOMEN: Are you currently pregnant?                                | 1. Yes<br>2. No<br>3. Don't know                                                                                                                                                                                                                                                                                                                                                                                                                                                                                                                                                                             |
| Q17. Do you smoke?                                                         | 1. Yes<br>2. No                                                                                                                                                                                                                                                                                                                                                                                                                                                                                                                                                                                              |

| Q18. Please evaluate whether each of these statements is true, somewhat true, somewhat untrue or not true:         |      |               |                 |          |         |
|--------------------------------------------------------------------------------------------------------------------|------|---------------|-----------------|----------|---------|
|                                                                                                                    | True | Somewhat true | Somewhat untrue | Not true | DK/Ref. |
| a. You have a high level of stress throughout the year                                                             | 1    | 2             | 3               | 4        | 9       |
| b. You try to live healthy by eating well, sleeping well                                                           | 1    | 2             | 3               | 4        | 9       |
| c. You have regular physical activity (like walking, physical work, recreation, sports, etc.) at least once a week | 1    | 2             | 3               | 4        | 9       |
| d. You go out regularly at least once a week                                                                       | 1    | 2             | 3               | 4        | 9       |

## VI. Information about COVID-19 exposure in the office

|                                                                        |                                         |
|------------------------------------------------------------------------|-----------------------------------------|
| Now, please explain the situation in the office.                       |                                         |
| Q19. How many people are in the place / space / office where you work? | __ __  persons                          |
| Q20. What is the size of the office?                                   | __ __  square meters<br>999. Don't know |

| Q21. Please evaluate whether each of these statements about you and your colleagues is true, somewhat true, somewhat untrue or not true: |      |               |                 |          |         |
|------------------------------------------------------------------------------------------------------------------------------------------|------|---------------|-----------------|----------|---------|
|                                                                                                                                          | True | Somewhat true | Somewhat untrue | Not true | DK/Ref. |
| a. Masks are held properly (mouth and nose) by your peers                                                                                | 1    | 2             | 3               | 4        | 9       |
| b. Everyone maintains a 2-meter distance in the office                                                                                   | 1    | 2             | 3               | 4        | 9       |
| c. A 2-meter distance is maintained in other premises outside / besides the office                                                       | 1    | 2             | 3               | 4        | 9       |
| d. Work leave / stay at home is granted temporarily to persons who show symptoms                                                         | 1    | 2             | 3               | 4        | 9       |
| e. Work leave / stay at home is granted temporarily to persons who get tested and test positive                                          | 1    | 2             | 3               | 4        | 9       |
| f. You and / or your colleagues stay together in crowded places, in places like buffet or any common part in the work environment        | 1    | 2             | 3               | 4        | 9       |
| g. You think all your colleagues have been careful and you have been protected in every way by COVID-19                                  | 1    | 2             | 3               | 4        | 9       |

**VII. Information regarding exposure to COVID-19 at work**

*ONLY FOR MUNICIPAL WORKERS.*

|                                                                          |                 |                          |
|--------------------------------------------------------------------------|-----------------|--------------------------|
| Q22. Do you work with client/parties?                                    | 1. Yes<br>2. No | GO TO Q23<br>SKIP TO Q24 |
| Q23. Are there protection panels when dealing with clients/parties?      | 1. Yes<br>2. No |                          |
| Q24. How many people do you meet during the day?                         | __ __  persons  |                          |
| Q25. How many days did you work from home in the period March-July 2020? | __ __  day      |                          |

### VIII. Information regarding exposure to COVID-19 at work

*ONLY FOR HEALTH WORKERS.*

|                                                                          |                                     |
|--------------------------------------------------------------------------|-------------------------------------|
| Q26. Do you have regular contact with patients with COVID-19?            | 1. Yes<br>2. No<br>3. Don't know    |
| Q27. Do you work in the testing or treatment unit of COVID-19 patients?  | 1. Yes<br>2. No                     |
| Q28. How many confirmed cases of COVID-19 have you had contact with?     | __ __  persons      999. Don't know |
| Q29. How many suspected cases of COVID-19 have you had contact with?     | __ __  persons      999. Don't know |
| Q30. Have you previously been diagnosed with a nasal sample test (PCR)?  | 1. Yes<br>2. No                     |
| Q31. Have you had COVID-19 compatible symptoms within the last 6 months? | 1. Yes<br>2. No                     |
| Q32. Did you get the flu vaccine in 2019?                                | 1. Yes<br>2. No                     |



### IX. Information about your behavior towards safeguards

| Q33. Please evaluate whether each of these statements is true, somewhat true, somewhat untrue or not true for you personally: |      |               |                 |          |         |
|-------------------------------------------------------------------------------------------------------------------------------|------|---------------|-----------------|----------|---------|
|                                                                                                                               | True | Somewhat true | Somewhat untrue | Not true | DK/Ref. |
| a. You hold the mask properly (mouth and nose)                                                                                | 1    | 2             | 3               | 4        | 9       |
| b. You keep a 2-meter distance from everyone in the office                                                                    | 1    | 2             | 3               | 4        | 9       |
| c. You keep a 2-meter distance in other premises outside / besides the office                                                 | 1    | 2             | 3               | 4        | 9       |
| d. You wash your hands regularly (several times a day) with soap or disinfectant                                              | 1    | 2             | 3               | 4        | 9       |
| e. You have been provided with information materials or similar information about COVID-19 by officials or management         | 1    | 2             | 3               | 4        | 9       |
| f. You have read those informative materials in detail                                                                        | 1    | 2             | 3               | 4        | 9       |
| g. You think you have been careful and protected in every way by COVID-19                                                     | 1    | 2             | 3               | 4        | 9       |

**X. Information about the infection**

Q34. If you have had COVID-19, what symptoms have you had? MULTIPLE ANSWERS

1. Temperature
2. Headache
3. Sore throat
4. Coughing
5. Muscle pain (myalgia)
6. Diarrhea
7. Fever
8. Difficulty breathing
9. Fatigue
10. New loss of taste or smell
11. Congested and leaking noses
12. Pain / vomiting
13. Didn't have symptoms
14. Didn't have COVID-19
15. Other: \_\_\_\_\_

M-5. Interviewer's code \_\_\_\_
